# Supplementary material
Source: PubMed Central journal article supplement (PMC3658114)
Supplement: NIHMS453514-supplement-Suppl_Material1.pdf [file NIHMS453514-supplement-Suppl_Material1.pdf]

**UI Biobank Knowledge and Attitudes  
RDD and Oversample**

**INTRO1**

Hello, my name is [YOUR NAME]. I'm calling from the University of Northern Iowa Center for Social and Behavioral Research. We are working with researchers at the University of Iowa and are conducting a study about people's views about genetic research and the storage and use of biological tissue to improve healthcare. First, am I speaking with a member of the household who is 18 years of age or older?

**PRVRES**

Have I reached a residential phone number?

1. Yes
2. No [**EXIT**: We are only trying to call people at their homes. I'm sorry to have bothered you. Good-bye.] [**AUTO CODE: 4500**]

**IADULT**

In order to determine who we need to interview from your household, I need to know how many adults, 18 years of age or older live in your household?

\_\_\_ Enter number of adults [**If greater than 1, skip to IMEN**]

**77. DON'T KNOW/NOT SURE**

**88. NONE (READ: For the purposes of our study, we are only interviewing people age 18 years of age or older. Thank you very much for your time.)**

**IONEADLT**

Are you the adult? [**ASK GENDER IF NECESSARY**]

1. Yes, respondent is male (**READ: Then you are the person I need to speak with.**) **Skip to SICONF**
2. Yes, respondent is female (**READ: Then you are the person I need to speak with.**) **Skip to SICONF**
3. No

**7. DON'T KNOW/NOT SURE**

**IASKGEND**

Is the adult a man or woman?

1. Male
2. Female

**IASKFORA**

May I speak with [**him/her**]?

1. Yes, Adult coming to the phone [**Skip to SIntro2**]
2. No, go to next screen press F3 to schedule callback.

## **7. DON'T KNOW/NOT SURE**

### **IMEN**

You said there are \_\_\_ adults in your household 18 years of age or older.  
How many of these adults are men?

\_\_\_ Enter Number of Men

## **77. DON'T KNOW/NOT SURE**

### **IWOMEN**

How many of these adults are women?

\_\_\_ Enter Number of Women

## **77. DON'T KNOW/NOT SURE**

### **IRSELECT**

The person in your household I need to speak with is the [State age rank and gender of selected respondent] age 18 or older. Are you the \_\_\_\_\_?

1. Yes (**READ:** Then you are the person I need to speak with.) **Skip to SICONF**
2. No

### **IASKFORR**

May I speak with the \_\_\_\_\_?

1. Yes, Selected respondent coming to the phone
2. No, go to the next screen press F3 to schedule a callback
3. Go Back to Adults Question [Warning: a new respondent may be selected.]

### **INTRO2**

Hello, my name is [YOUR NAME]. I'm calling from the University of Northern Iowa Center for Social and Behavioral Research. We are working with researchers at the University of Iowa and are conducting a study about people's views about genetic research and the storage and use of biological tissue to improve healthcare.

### **CONFIDENTIALITY**

Your participation is voluntary and confidential. There are no direct benefits and risks are minimal and similar to those typically encountered in your day-to-day life. Participating in the interview takes about 20 minutes for most people. Your household phone number was called randomly so that your interview will represent many others in your area. I can provide the name and telephone number of the project manager or of the University Research Protections Office if you have any questions about the study. If we come to any question you do not wish to answer, please let me know and we will move on.

1. What comes to mind when you hear the phrase medical research? [**OPEN END**]

2. Have you ever participated in a medical research study?

1. Yes
2. No

**7. DON'T KNOW/NOT SURE**

**9. REFUSED**

3. If you were asked to take part in a medical research study in the next year, how likely would you be to participate? Would you definitely, probably, probably not, or definitely not participate?

1. Definitely would participate
2. Probably would participate
3. Probably would not participate [SKIP TO 5]
4. Definitely would not participate [SKIP TO 5]

**7. DON'T KNOW/NOT SURE**

**9. REFUSED**

4. What are the main reasons you would participate in a medical research study?  
[SELECT UP TO 3] [DO NOT READ]

11. Research is good to advance medicine or science
12. To help others with the condition
13. To obtain education about treatment/improving my health
14. To obtain better treatment for my condition
15. I was curious about the specifics of the study
16. The information I read, saw, or had heard about the study influenced me
17. My doctor recommended the study
18. To earn extra money
19. To obtain free medication
20. Other [SPECIFY]

**77. DON'T KNOW/NOT SURE**

**99. REFUSED**

[IF 3<3, SKIP TO 6]

5. What are the main reasons you would NOT participate in a medical research study?  
[SELECT UP TO 3] [DO NOT READ]

11. Depends on the type of study
12. Too risky/dangerous/side effects
13. Do not have the time
14. Just not interested in it/don't believe in it
15. Health problems/not healthy enough

- 16. Age too old
- 17. Other [SPECIFY]

**77. DON'T KNOW/NOT SURE**  
**99. REFUSED**

6a. Have you ever heard the term biobank or biorepository?

- 1. Yes
- 2. No [SKIP TO 7]

**7. DON'T KNOW/NOT SURE [SKIP TO 7]**  
**9. REFUSED [SKIP TO 7]**

6b. Can you briefly tell me what you have heard about a biobank or biorepository?  
[OPEN END]

7. Biobanks are typically managed by a medical center and...

Store biological samples such as blood or tissue. These samples could be left over from either inpatient or outpatient medical procedures such as blood draws, surgeries or biopsies. Or, they could come from procedures like blood draws done to get samples specifically for the biobank.

Biobanks store a patient's medical records along with their samples.

Biobanks provide samples and medical records to scientists to conduct medical research.

Biobanks keep people's samples and information for many years, so research can be done on them well into the future.

The University of Iowa Hospitals and Clinics is considering developing a biobank. Samples that are left over from a standard procedure, during a routine visit at the University of Iowa Hospitals and Clinics, such as a blood draw, biopsy, or surgery, that would otherwise be discarded, would instead be collected for the biobank. With the exception of those too ill to participate, all patients at the University of Iowa Hospitals and Clinics will be invited to participate. The collected samples would be linked to each patient's medical records. Both the sample and the medical record information could be used for medical research, aimed at development of possible new treatments and better understanding the causes and courses of diseases.

Using a scale of 1 to 5 where 1 is not at all valuable and 5 is extremely valuable, how valuable would you say such a biobank would be as a resource?

- 1. Not at all valuable
- 2.
- 3.
- 4.

5. Extremely valuable

**7. DON'T KNOW/NOT SURE**

**9. REFUSED**

8a-d. I am going to list several types of research that can be conducted with samples from a biobank. For each one, using a scale of 1 to 5 where 1 represents not at all important and 5 represents extremely important, please tell me how important you think it is to conduct this type of research.

[RANDOMIZE]

8a. First, researchers could use DNA from cancer tissue that was stored in biobanks to better understand the genetics of cancer

8b. Researchers could use blood samples stored in biobanks to study the genetics of mental illnesses such as bipolar disorder or schizophrenia

8c. Researchers could use urine samples stored in biobanks to improve how diabetes is managed

8d. Researchers could use samples from an infected wound that are stored in a biobank to learn more about the bacteria that caused the infection

1. Not at all important

2.

3.

4.

5. Extremely important

**7. DON'T KNOW/NOT SURE**

**9. REFUSED**

9. There are different approaches the University of Iowa Hospitals and Clinics could take in asking you, or other patients for permission to include an otherwise discarded tissue or blood sample in their biobank. I will describe some of these approaches to you and then ask for your reactions.

In the first approach, No Consent, you would not be asked whether your leftover sample and medical information could be used for the biobank and its research. The sample would simply be stored in the biobank and used for research, rather than discarded.

Please tell me how much you support or oppose this approach. Would you say that you strongly oppose, somewhat oppose, somewhat support, or strongly support this approach to gaining permission to collect samples for a biobank?

1. Strongly oppose

2. Somewhat oppose

3. Somewhat support
4. Strongly support

**7. DON'T KNOW/NOT SURE [SKIP TO 11]**

**9. REFUSED [SKIP TO 11]**

**[IF 9 <3 SKIP TO 10b]**

10a. What is the main reason you support this method?

**[SELECT ONLY ONE] [DO NOT READ]**

1. The samples would be discarded otherwise
2. For research, it will help others
3. I do not want to have to read or sign any other papers when I go to the hospital or clinic
4. Other [SPECIFY]

**7. DON'T KNOW/NOT SURE**

**9. REFUSED**

**[SKIP TO 11]**

10b. What is the main reason you oppose this method?

**[SELECT ONLY ONE] [DO NOT READ]**

1. I do not want to participate in research
2. I do not want my sample used for research
3. I want to have the choice whether or not my sample is included in research
4. Other [SPECIFY]

**7. DON'T KNOW/NOT SURE**

**9. REFUSED**

11. The second approach is referred to as opt-out. You would be asked to sign a form only if you DO NOT want your samples and medical information included in the biobank.

Would you say that you strongly oppose, somewhat oppose, somewhat support, or strongly support this approach to gaining permission to collect samples for a biobank?

1. Strongly oppose
2. Somewhat oppose
3. Somewhat support
4. Strongly support

**7. DON'T KNOW/NOT SURE [SKIP TO 13]**

**9. REFUSED [SKIP TO 13]**

**[IF 11 <3, SKIP TO 12b]**

12a. What is the main reason you support this method?  
**[SELECT ONLY ONE] [DO NOT READ]**

1. The samples would be discarded otherwise
2. For research, it will help others
3. I have the choice whether or not my sample is included in research.
4. I want to participate in research but I do not want to sign any more papers when I go to the hospital or clinic
5. Other **[SPECIFY]**

**7. DON'T KNOW/NOT SURE**

**9. REFUSED**

**[SKIP TO 13]**

12b. What is the main reason you oppose this method?  
**[SELECT ONLY ONE] [DO NOT READ]**

1. I do not want to participate in research
2. It seems confusing.
3. I am concerned that I might not be given the opportunity to opt-out/my samples would be used without my knowledge.
4. I do not want to have to read or sign any other papers when I go to the hospital or clinic.
5. Other **[SPECIFY]**

**7. DON'T KNOW/NOT SURE**

**9. REFUSED**

13. If this opt-out approach were in place, how likely would you be to allow your sample to be included in the biobank? Would you say that you definitely would not agree to provide your sample, probably would not agree to provide your sample, probably would agree to provide your sample, or definitely would agree to provide your sample?

1. Definitely would not agree to provide sample
2. Probably would not agree to provide sample
3. Probably would agree to provide sample
4. Definitely would agree to provide sample

**7. DON'T KNOW/NOT SURE**

**9. REFUSED**

14. The third approach is called opt-in. You would be asked to sign a form only if you DO want your samples and medical information included in the biobank.

Would you say that you strongly oppose, somewhat oppose, somewhat support or strongly support this approach to gaining permission to collect samples for a biobank?

1. Strongly oppose
2. Somewhat oppose
3. Somewhat support
4. Strongly support

**7. DON'T KNOW/NOT SURE [SKIP TO 16]**

**9. REFUSED [SKIP TO 16]**

**[IF 14 <3 SKIP TO 15b]**

15a. What is the main reason you support this method?

**[SELECT ONLY ONE] [DO NOT READ]**

1. For research, it will help others
2. I feel confident that my samples would only be used with my permission.
3. It is the normal way that you agree to participate in research.
4. It is easy to understand.
5. Other [**SPECIFY**]
6. I have the choice whether or not my sample is included in research.

**7. DON'T KNOW/NOT SURE**

**9. REFUSED**

**[SKIP TO 16]**

15b. What is the main reason you oppose this method?

**[SELECT ONLY ONE] [DO NOT READ]**

1. I do not want to participate in research.
2. I do not want to be asked about research when I go to the hospital or clinic.
3. I want to participate in research but I do not want to sign any more papers when I go to the hospital or clinic.
4. Fewer people may participate, therefore limiting important research.
5. Other [**SPECIFY**]

**7. DON'T KNOW/NOT SURE**

**9. REFUSED**



16. If this opt-in approach were in place, how likely would you be to allow your sample to be included in the biobank? Would you say that you definitely would not agree to provide your sample, probably would not agree to provide your sample, probably would agree to provide your sample, or definitely would agree to provide your sample?

1. Definitely would not agree to provide sample
2. Probably would not agree to provide sample
3. Probably would agree to provide sample
4. Definitely would agree to provide sample

**7. DON'T KNOW/NOT SURE**

**9. REFUSED**

17. Of the three approaches, no consent, opt-out or opt-in, which, if any, do you prefer?

**[REVIEW OPTIONS IF NECESSARY]**

1. No consent
2. Opt-out
3. Opt-in
4. No preference
5. None of the above
6. Other **[SPECIFY]**

**7. DON'T KNOW/NOT SURE**

**9. REFUSED**

18. I mentioned earlier that samples and health information stored in biobanks could be used for many years in different kinds of research. At the time samples are collected, it may not be possible to say in exactly what kind of research the samples would be used. There are several different approaches for gaining permission for use of samples in future research. For each approach, please tell me whether you support or oppose the approach.

The first approach is known as blanket permission – once you have agreed to have your sample and medical information included in the biobank, it could be used in any research approved by the university research review board, and you would only give permission once.

Would you say that you strongly oppose, somewhat oppose, somewhat support, or strongly support this blanket permission approach to gaining permission to store samples for future research in a biobank?

1. Strongly oppose
2. Somewhat oppose
3. Somewhat support

4. Strongly support

**7. DON'T KNOW/NOT SURE [SKIP TO 20]**

**9. REFUSED [SKIP TO 20]**

**[IF 18 <3 SKIP TO 19b]**

19a. What is the main reason you support this method?

**[SELECT ONLY ONE] [DO NOT READ]**

1. For research, it will help others
2. It allows for research in the future that might not have been considered yet.
3. It allows the samples to be used for the projects they are most appropriate for.
4. I only have to sign the paper or be asked about the research once.
5. Other **[SPECIFY]**

**7. DON'T KNOW/NOT SURE**

**9. REFUSED**

**[SKIP TO 20]**

19b. What is the main reason you oppose this method?

**[SELECT ONLY ONE] [DO NOT READ]**

1. I do not want my sample used for certain types of research.
2. I am concerned that research may be developed in the future that I would not want my sample used for.
3. Other **[SPECIFY]**

**7. DON'T KNOW/NOT SURE**

**9. REFUSED**

20. The next approach is called menu permission. In this case, once you have agreed to have your sample and medical information included in the biobank, you could select from a list of research categories, in which your sample could be used.

Would you say that you strongly oppose, somewhat oppose, somewhat support or strongly support this menu approach to gaining permission to store samples in a biobank?

1. Strongly oppose
2. Somewhat oppose
3. Somewhat support
4. Strongly support

**7. DON'T KNOW/NOT SURE [SKIP TO 22]**

**9. REFUSED [SKIP TO 22]**

**[IF 20 <3 SKIP TO 21b]**

21a. What is the main reason you support this method?

**[SELECT ONLY ONE] [DO NOT READ]**

1. For research, it will help others
2. I like having the choice
3. I want to contribute to research on topics that I feel are important or that have special meaning to me.
4. I don't want my sample used for some types of research.
5. Other **[SPECIFY]**

**7. DON'T KNOW/NOT SURE**

**9. REFUSED**

**[SKIP TO 22]**

21b. What is the main reason you oppose this method?

**[SELECT ONLY ONE] [DO NOT READ]**

1. It will be too burdensome to choose from all of the categories.
2. I don't feel qualified to choose what my sample should be used for
3. My sample may not be used for research in the future that it otherwise could be used for.
4. I don't trust that my selections would be honored anyway.
5. Other **[SPECIFY]**

**7. DON'T KNOW/NOT SURE**

**9. REFUSED**

22. The next approach is referred to as Case-by-Case permission. In this approach, once you have agreed to have your sample and medical information included in the biobank, you would be contacted and asked permission for every study in which your sample might be used.

Would you say that you strongly oppose, somewhat oppose, somewhat support or strongly support this case-by-case approach to gaining permission to store samples in a biobank?

1. Strongly oppose
2. Somewhat oppose
3. Somewhat support
4. Strongly support

**7. DON'T KNOW/NOT SURE [SKIP TO 24]**

**9. REFUSED [SKIP TO 24]**

**[IF 22 <3 SKIP TO 23b]**

23a. What is the main reason you support this method?

**[SELECT ONLY ONE] [DO NOT READ]**

1. For research, it will help others
2. I want to know what my sample is used for
3. I like having the choice
4. I want to contribute to research on topics that I feel are important or that have special meaning to me.
5. I don't want my sample used for some types of research.
6. Other [**SPECIFY**]

**7. DON'T KNOW/NOT SURE**

**9. REFUSED**

**[SKIP TO 24]**

23b. What is the main reason you oppose this method?

**[SELECT ONLY ONE] [DO NOT READ]**

1. It would be too burdensome to be contacted each time a researcher wants to use my sample.
2. I don't feel qualified to choose what my sample should be used for.
3. I am concerned that it would limit the research that could be done.
4. Other [**SPECIFY**]

**7. DON'T KNOW/NOT SURE**

**9. REFUSED**

24. Of the three approaches for asking permission for future use of samples, blanket, menu, or case-by-case, which, if any, do you prefer?

1. Blanket
2. Menu
3. Case-by-Case
4. No Preference
5. None of the above
6. Other [**SPECIFY**]

**7. DON'T KNOW/NOT SURE**

**9. REFUSED**

25. As we've discussed, many biobanks obtain blood or tissue samples from patients by using samples that are left over from routine procedures, such as a blood draw or surgery. Some biobanks also obtain samples by asking patients to come to the medical center specifically to undergo a blood draw or donate a small amount of tissue to the biobank for a specific research study.

Thinking about the two means of collecting samples, do you have a preference for one over the other or do you view them as equally workable options?

1. Use those that are left over from routine medical procedures,
2. Ask for specific donations to the biobank,
3. Both are equally workable.

**7. DON'T KNOW/NOT SURE**

**9. REFUSED**

26. Would you prefer making decisions about being included in biobank research...

1. Entirely by yourself,
2. With help from your doctor or health care provider,
3. With help from a health care provider, not your own,
4. With help from someone at the biobank, or
5. The clerk at check-in?
6. Other [SPECIFY]

**7. DON'T KNOW/NOT SURE**

**9. REFUSED**

27a-e. In the proposed biobank, researchers would have access to tissue and blood samples as well as patient medical records. However, instead of seeing your full medical record, the researchers would see a copy that has all personally identifying information, like name, date of birth, address, and Social Security number removed, so they wouldn't know who the sample or health information belongs to, but they would still have access to health history and information that they would need for their research. The identifying information, like name and address, would be replaced by a code number. So, for example, instead of seeing "Sally Smith has a history of high blood pressure and had a heart attack at age 50" they would see "female participant 1234 has a history of high blood pressure and had a heart attack at age 50."

In some circumstances, it might be necessary or desirable, for identifying information to be available or re-linked. I am going to read several scenarios. After each, please tell me if you

think it would be acceptable or unacceptable for the identifying information to be made available again and re-linked.

Your identifiable information would be available or re-linked in order to...

- a. Contact you and ask you for more tissue or blood
- b. Contact you and ask you to participate in additional research activities. This would be voluntary and you could say yes or no to any or all requests.
- c. Contact you and give you information about what researchers found from your sample if the information could be used to prevent or treat a condition that you have or could be at risk to develop.
- d. Contact you and give you information about what researchers found from your sample regardless of whether or not the information could be used to prevent or treat a condition that you have or could be at risk to develop.
- e. Make sure that researchers who have an ongoing study can be sure that the samples from the biobank do not duplicate patient samples they are already using.

1. Yes, acceptable [**SKIP TO 28**]
2. No, unacceptable

**7. DON'T KNOW/NOT SURE**

**9. REFUSED**

**[FOR EACH "YES" TO 27a-d, ASK 28a-d]**

28a-d. In this scenario, who would be the best person to contact you?

**[REPEAT SCENARIO IF NECESSARY]**

1. The researcher,
2. A member of the biobank staff,
3. Your physician or healthcare provider,
4. A healthcare provider at the medical center, not your own,
5. You have no preference,
6. Or someone else? [**SPECIFY**]

**7. DON'T KNOW/NOT SURE**

**9. REFUSED**

29. As we just discussed, participation in a biobank typically involves inclusion of both your biological samples and medical information to be used in medical research. Some people are comfortable providing both samples and medical information from their health records, some are more comfortable providing just medical information and others are more comfortable providing

just the biological samples. Which would you say most closely represents your view? Would you say you are...

1. Comfortable providing both medical information and biological samples,
2. Comfortable providing only medical information, or
3. Comfortable providing only biological samples?

**4. NOT COMFORTABLE PROVIDING EITHER**

**7. DON'T KNOW/NOT SURE**

**9. REFUSED**

30. Although we covered this earlier, once again using a scale of 1 to 5 where 1 is not at all valuable and 5 is extremely valuable, how valuable would you say a biobank would be as a resource?

1. Not at all valuable
- 2.
- 3.
- 4.
5. Extremely valuable

**7. DON'T KNOW/NOT SURE**

**9. REFUSED**

31. Now, we have just a few background questions and we will be finished. Would you say that in general your health is...

1. Excellent,
2. Very good,
3. Good,
4. Fair, or
5. Poor?

**7. DON'T KNOW/NOT SURE**

**9. REFUSED**

32a-d. I'm going to read a list of types of medical visits. Please tell me if you made a visit to any of the following in the last 5 years?

- a. Physician's office
- b. Inpatient hospital visit
- c. Outpatient hospital visit
- d. Emergency room

1. Yes
2. No

**7. DON'T KNOW/NOT SURE**

**9. REFUSED**

**[IF 32a, 32b, 32c, OR 32d = 1, SKIP TO 34]**

33. Have you been to a hospital or medical/doctor's office for health services for yourself in the past 10 years?

1. Yes
2. No

**7. DON'T KNOW/NOT SURE**

**9. REFUSED**

34. Were you a patient at University of Iowa Hospitals and Clinics during the past year? This would include any hospital stay or visit to a doctor at University of Iowa Hospitals and Clinics – either in Iowa City or at a UIHC Clinic in or near your community.

1. Yes [**SKIP TO 36**]
2. No

**7. DON'T KNOW/NOT SURE**

**9. REFUSED**

35. How about during the past five years?

1. Yes
2. No

**7. DON'T KNOW/NOT SURE**

**9. REFUSED**

36. Have you or a member of your family...

- a. Been diagnosed with a genetic condition?
- b. Had genetic testing?
- c. Seen a genetic counselor?

1. Yes
2. No

**7. DON'T KNOW/NOT SURE**

**9. REFUSED**

37. And you are...



- 1. Male
- 2. Female

**9. REFUSED**

38. What is your age?

\_\_ \_\_ \_\_ Years

**7. DON'T KNOW/NOT SURE**

**9. REFUSED**

39. Are you Hispanic or Latino?

- 1. Yes
- 2. No

**7. DON'T KNOW/NOT SURE**

**9. REFUSED**

40. Which one or more of the following would you say is your race?

- 1. White (Hispanic)
- 2. Black or African American (Hispanic)
- 3. Asian (Hispanic)
- 4. Native Hawaiian or Other Pacific Islander (Hispanic)
- 5. American Indian, Alaska Native (Hispanic)
- 6. Other (Hispanic) [**specify:**] \_\_\_\_\_

**7. DON'T KNOW/NOT SURE**

**9. REFUSED**

**[SKIP TO 42 IF ONLY ONE RESPONSE TO 40]**

41. Which one of these groups would you say **best** represents your race?

**[DO NOT READ]**

- 1. White
- 2. Black or African American
- 3. Asian
- 4. Native Hawaiian or Other Pacific Islander
- 5. American Indian, Alaska Native
- 6. Other [**specify:**] \_\_\_\_\_

**7. DON'T KNOW/NOT SURE**

**9. REFUSED**

42. Now, for analysis purposes only, what was the total income of all persons in your household over the past year, including salaries or other earnings, interest, retirement, and so on, for all household members combined?

- 11. \$0 to \$5,000
- 12. \$5,001 to \$10,000
- 13. \$10,001 to \$15,000
- 14. \$15,001 to \$20,000
- 15. \$20,001 to \$25,000
- 16. \$25,001 to \$30,000
- 17. \$30,001 to \$35,000
- 18. \$35,001 to \$40,000
- 19. \$40,001 to \$45,000
- 20. \$45,001 to \$50,000
- 21. \$50,001 to \$55,000
- 22. \$55,001 to \$60,000
- 23. \$60,001 to \$65,000
- 24. \$65,001 to \$70,000
- 25. \$70,001 to \$75,000
- 26. \$75,001 to \$80,000
- 27. \$80,001 or more

**77. DON'T KNOW/NOT SURE**

**99. REFUSED**

43. What is your zip code? [   ]

**77777. DON'T KNOW/NOT SURE**

**99999. REFUSED**

44. How many telephone lines come into your residence that are not dedicated lines to a modem or fax?

[   ] Phone lines [0-20]

**77. DON'T KNOW/NOT SURE**

**99. REFUSED**

45. Does anyone in your household own a cell phone?

- 1. Yes
- 2. No

**7. DON'T KNOW/NOT SURE**

**9. REFUSED**

**[IF 45>1, SKIP 48]**

46. How many people in your household regularly use a cell phone?

\_\_\_\_\_ People

**77. DON'T KNOW/NOT SURE**

**99. REFUSED**

47. From all calls made by household members, would you say that cell phones are used for ...

1. almost all calls,
2. most calls,
3. some calls, or
4. rarely used?

**7. DON'T KNOW/NOT SURE**

**9. REFUSED**

48. What is the highest grade or level of school that you have completed?

1. 8th grade or less
2. Some high school, but did not graduate
3. High school graduate or GED
4. Some college or 2-year degree
5. 4-year college graduate
6. More than 4-year college degree

**7. DON'T KNOW/NOT SURE**

**9. REFUSED**

49. What is your religious preference, if any?

**[DO NOT READ]**

11. Protestant (Baptist, Disciples of Christ, Episcopal, Lutheran, Mennonite, Methodist, Presbyterian, Quaker, Church of Christ)
12. Evangelical/Fundamentalist (Free Church, Vine Church, Born-again or explicit mention of "evangelical" or "fundamentalist")
13. Hist. black churches (African Methodist Episcopal)
14. Catholic
15. Mormon
16. Jehovah's Witness
17. Greek Orthodox
18. Russian Orthodox
19. Christian (other or none of the above specified)
20. Jewish (Reformed, Conservative, Orthodox)
21. Buddhist (Zen, Theravada, Tibetan)
22. Muslim (Shia, Sunni)
23. Hindu
24. Unitarian
25. New Age
26. Native American religion
27. Secular Humanist
28. Atheist
29. Agnostic

- 30. Pagan
- 31. Wiccan
- 32. Spiritual but not religious
- 33. Other [**SPECIFY**]

**88. NONE**

**77. DON'T KNOW/NOT SURE**

**99. REFUSED**

**CLOSE**

That's my last question. Thank you for your time and cooperation. Good-bye.

**INTERVIEWER COMMENTS:**
