# Supplementary material
Source: PubMed Central journal article supplement (PMC3658114)
Supplement: NIHMS453514-supplement-Suppl_Material2.pdf [file NIHMS453514-supplement-Suppl_Material2.pdf]

# What is a biobank?

## Biobanks...

- ❖ Store biological samples such as human blood or tissue.
- ❖ Store a patient's medical records along with their samples.
- ❖ Provide samples and medical records to scientists to conduct medical research.
- ❖ Keep samples and information for many years so research can be done on them well into the future.
- ❖ Can be thought of as a library that researchers have special permission to go to and check out biological samples for research purposes.

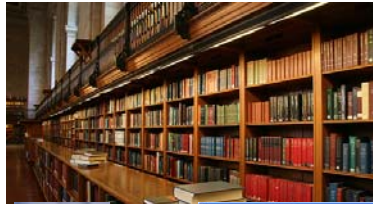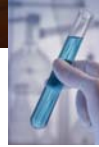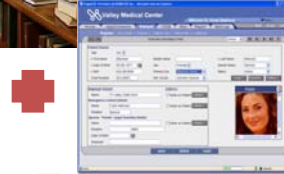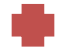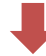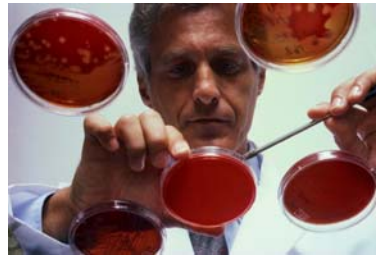

# Examples of research...

## Genetic Research

DNA from cancer tissue → Study the genetics of cancer

Blood samples → Study the genetics of bipolar disorder and schizophrenia

## Other Research

Urine sample → Improve diabetes management

Culture from infected wound → Study the bacteria that cause infection

# Approval for Use of Biological Samples

Hospital Research Review Board

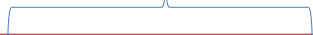

## Option #1

**Participant Gives Blanket  
Permission for All Research**

Present → Future

In addition to the hospital research review board, an advisory board may also assist with reviewing the research.

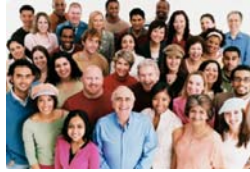

# Approval for Use of Biological Samples

Hospital Research Review Board

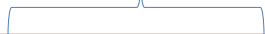

## Option #2

**Participant Chooses From a  
“Menu” of Possible Research  
Uses**

Participant receives list of possible research uses and provides approval for specific types of studies he/she believes are acceptable.

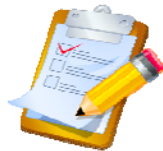

# Approval for Use of Biological Samples

Hospital Research Review Board

## Option #3

Participant Contacted Prior to EACH Study

Approval given on a case-by-case basis.

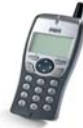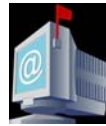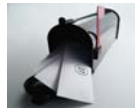

# Identified vs. De-identified Information

The image displays two screenshots of a medical software interface, likely a patient management system. The top screenshot shows a patient's full details, including name, birth date, insurance, and contact information. The bottom screenshot shows the same patient's information with key fields redacted (blacked out) to represent de-identified data.

| File # | Patient Name        | Mobile      | Date of Birth      | City      | Email                |
|--------|---------------------|-------------|--------------------|-----------|----------------------|
| 00001  | Mr. Mark S. Gali    | 0988493     | December 08, 1995  | Dubai     | Mark@hmail.com       |
| 00002  | Mrs. Cindy W. Fong  | 56286240    | April 18, 1974     | Abu Dhabi | Cindy@yahoo.com      |
| 00003  | Mr. Ravinder W. Das | 0104254356  | January 14, 1970   | Dubai     | Das23@yahoo.com      |
| 00004  | Mr. Albert H. James | 01076780587 | September 14, 1962 | Dubai     | Alk1kian@hotmail.com |

## Handling Identifying Information...

Option #1: The first option is for both biobank staff and researchers to have access to your identifying information.

Option #2: A second option is for biobank staff to have access to identifying information about you but not the researchers.

Option #3: A third option is for neither the biobank staff nor the researchers to have access to any identifying information about you.
